# Supplementary material for: Predicting Carbapenem-Resistant Enterobacteriaceae Carriage at the Time of Admission Using a Statewide Hospital Discharge Database
Source: PubMed Central journal article supplement — Open Forum Infect Dis. 2019 Nov 10;6(12):ofz483. doi: 10.1093/ofid/ofz483 (PMC7047960; doi:10.1093/ofid/ofz483), 2019-11-10

## **Supplementary Appendix**

This appendix has been provided by the authors to give readers additional information about their work.

Supplement to: Lin MY, Ray MJ, Rezny S, et al. Predicting Carbapenem-Resistant Enterobacteriaceae Carriage at the Time of Admission Using a State-Wide Hospital Discharge Database.

# Predicting Carbapenem-Resistant Enterobacteriaceae Carriage at the Time of Admission Using a State-Wide Hospital Discharge Database

## Table of Contents

|                                                                                                                       |        |
|-----------------------------------------------------------------------------------------------------------------------|--------|
| Table S1: Receiver Operating Curve Data Points for the Full Model Presented in Manuscript Table 1 and Figure S1 ..... | Page 3 |
| Figure S1: Receiver Operating Characteristic Curve for Full Model in Manuscript Table 1 ..                            | Page 6 |

**Table S1: Receiver Operating Curve Data Points for the Full Model Presented in Manuscript Table 1 and Supplement Figure S1**

Predicted probabilities (using bootstrap aggregation) are averages of estimates from 100 samples of 100 cases + corresponding controls

Area under the curve (trapezoidal rule) = 0.84215

| Predicted CRE Probability | Sensitivity | 1-Specificity | Specificity |
|---------------------------|-------------|---------------|-------------|
| 0                         | 1           | 1             | 0           |
| 0.0002                    | 1           | 1             | 0           |
| 0.0004                    | 0.989247    | 0.784518      | 0.215482    |
| 0.0006                    | 0.962366    | 0.620206      | 0.379794    |
| 0.0008                    | 0.892473    | 0.474499      | 0.525501    |
| 0.001                     | 0.860215    | 0.378193      | 0.621807    |
| 0.0012                    | 0.822581    | 0.315242      | 0.684758    |
| 0.0014                    | 0.784946    | 0.282752      | 0.717248    |
| 0.0016                    | 0.758065    | 0.263490      | 0.736510    |
| 0.0018                    | 0.741935    | 0.247206      | 0.752794    |
| 0.002                     | 0.736559    | 0.231268      | 0.768732    |
| 0.0022                    | 0.715054    | 0.214686      | 0.785314    |
| 0.0024                    | 0.688172    | 0.197177      | 0.802823    |
| 0.0026                    | 0.688172    | 0.180901      | 0.819099    |
| 0.0028                    | 0.661290    | 0.162879      | 0.837121    |
| 0.003                     | 0.645161    | 0.146764      | 0.853236    |
| 0.0032                    | 0.602151    | 0.131301      | 0.868699    |
| 0.0034                    | 0.591398    | 0.117078      | 0.882922    |
| 0.0036                    | 0.569892    | 0.103973      | 0.896027    |
| 0.0038                    | 0.548387    | 0.091021      | 0.908979    |
| 0.004                     | 0.510753    | 0.079747      | 0.920253    |
| 0.0042                    | 0.494624    | 0.069262      | 0.930738    |
| 0.0044                    | 0.473118    | 0.059956      | 0.940044    |
| 0.0046                    | 0.473118    | 0.051975      | 0.948025    |
| 0.0048                    | 0.456989    | 0.045051      | 0.954949    |
| 0.005                     | 0.430108    | 0.039046      | 0.960954    |
| 0.0052                    | 0.424731    | 0.034742      | 0.965258    |
| 0.0054                    | 0.424731    | 0.031134      | 0.968866    |
| 0.0056                    | 0.419355    | 0.027864      | 0.972136    |
| 0.0058                    | 0.419355    | 0.025559      | 0.974441    |
| 0.006                     | 0.419355    | 0.023743      | 0.976257    |
| 0.0062                    | 0.397849    | 0.022349      | 0.977651    |
| 0.0064                    | 0.392473    | 0.020902      | 0.979098    |
| 0.0066                    | 0.387097    | 0.019937      | 0.980063    |
| 0.0068                    | 0.376344    | 0.018949      | 0.981051    |
| 0.007                     | 0.376344    | 0.018336      | 0.981664    |
| 0.0072                    | 0.370968    | 0.017700      | 0.982300    |
| 0.0074                    | 0.370968    | 0.017210      | 0.982790    |
| 0.0076                    | 0.365591    | 0.016766      | 0.983234    |
| 0.0078                    | 0.365591    | 0.016406      | 0.983594    |

| Predicted CRE Probability | Sensitivity     | 1-Specificity   | Specificity     |
|---------------------------|-----------------|-----------------|-----------------|
| 0.008                     | 0.365591        | 0.015923        | 0.984077        |
| 0.0082                    | 0.365591        | 0.015602        | 0.984398        |
| 0.0084                    | 0.365591        | 0.015326        | 0.984674        |
| 0.0086                    | 0.365591        | 0.015111        | 0.984889        |
| 0.0088                    | 0.365591        | 0.014813        | 0.985187        |
| 0.009                     | 0.360215        | 0.014591        | 0.985409        |
| 0.0092                    | 0.360215        | 0.014323        | 0.985677        |
| 0.0094                    | 0.360215        | 0.014162        | 0.985838        |
| 0.0096                    | 0.360215        | 0.013970        | 0.986030        |
| 0.0098                    | 0.360215        | 0.013748        | 0.986252        |
| 0.01                      | 0.354839        | 0.013534        | 0.986466        |
| 0.02                      | 0.247312        | 0.006970        | 0.993030        |
| 0.03                      | 0.193548        | 0.004297        | 0.995703        |
| 0.04                      | 0.155914        | 0.003010        | 0.996990        |
| <b>0.05</b>               | <b>0.129032</b> | <b>0.002336</b> | <b>0.997664</b> |
| 0.06                      | 0.112903        | 0.001846        | 0.998154        |
| 0.07                      | 0.102151        | 0.001501        | 0.998499        |
| 0.08                      | 0.096774        | 0.001264        | 0.998736        |
| 0.09                      | 0.080645        | 0.001103        | 0.998897        |
| <b>0.1</b>                | <b>0.064516</b> | <b>0.000927</b> | <b>0.999073</b> |
| 0.12                      | 0.053763        | 0.000751        | 0.999249        |
| 0.14                      | 0.048387        | 0.000605        | 0.999395        |
| 0.16                      | 0.026882        | 0.000506        | 0.999494        |
| 0.18                      | 0.026882        | 0.000406        | 0.999594        |
| <b>0.2</b>                | <b>0.026882</b> | <b>0.000345</b> | <b>0.999655</b> |
| 0.22                      | 0.026882        | 0.000291        | 0.999709        |
| 0.24                      | 0.021505        | 0.000268        | 0.999732        |
| 0.26                      | 0.021505        | 0.000230        | 0.999770        |
| 0.28                      | 0.021505        | 0.000184        | 0.999816        |
| <b>0.3</b>                | <b>0.016129</b> | <b>0.000169</b> | <b>0.999831</b> |
| 0.32                      | 0.016129        | 0.000146        | 0.999854        |
| 0.34                      | 0.016129        | 0.000130        | 0.999870        |
| 0.36                      | 0.016129        | 0.000115        | 0.999885        |
| 0.38                      | 0.016129        | 0.000107        | 0.999893        |
| <b>0.4</b>                | <b>0.010753</b> | <b>0.000092</b> | <b>0.999908</b> |
| 0.42                      | 0.010753        | 0.000084        | 0.999916        |
| 0.44                      | 0.010753        | 0.000077        | 0.999923        |
| 0.46                      | 0.005376        | 0.000077        | 0.999923        |
| 0.48                      | 0.005376        | 0.000061        | 0.999939        |
| <b>0.5</b>                | <b>0.005376</b> | <b>0.000046</b> | <b>0.999954</b> |
| 0.52                      | 0.005376        | 0.000046        | 0.999954        |
| 0.54                      | 0.005376        | 0.000046        | 0.999954        |
| 0.56                      | 0.005376        | 0.000046        | 0.999954        |
| 0.58                      | 0.005376        | 0.000038        | 0.999962        |
| 0.6                       | 0.005376        | 0.000038        | 0.999962        |
| 0.62                      | 0.005376        | 0.000038        | 0.999962        |
| 0.64                      | 0.005376        | 0.000038        | 0.999962        |
| 0.66                      | 0.005376        | 0.000038        | 0.999962        |
| 0.68                      | 0               | 0.000038        | 0.999962        |

| Predicted CRE Probability | Sensitivity | 1-Specificity | Specificity |
|---------------------------|-------------|---------------|-------------|
| 0.7                       | 0           | 0.000031      | 0.999969    |
| 0.72                      | 0           | 0.000008      | 0.999992    |
| 0.74                      | 0           | 0.000008      | 0.999992    |
| 0.76                      | 0           | 0             | 1           |
| 0.78                      | 0           | 0             | 1           |
| 0.8                       | 0           | 0             | 1           |
| 0.82                      | 0           | 0             | 1           |
| 0.84                      | 0           | 0             | 1           |
| 0.86                      | 0           | 0             | 1           |
| 0.88                      | 0           | 0             | 1           |
| 0.9                       | 0           | 0             | 1           |
| 0.92                      | 0           | 0             | 1           |
| 0.94                      | 0           | 0             | 1           |
| 0.96                      | 0           | 0             | 1           |
| 0.98                      | 0           | 0             | 1           |
| 1                         | 0           | 0             | 1           |

**Figure S1:** Receiver Operating Characteristic Curve for Full Model in Manuscript Table 1

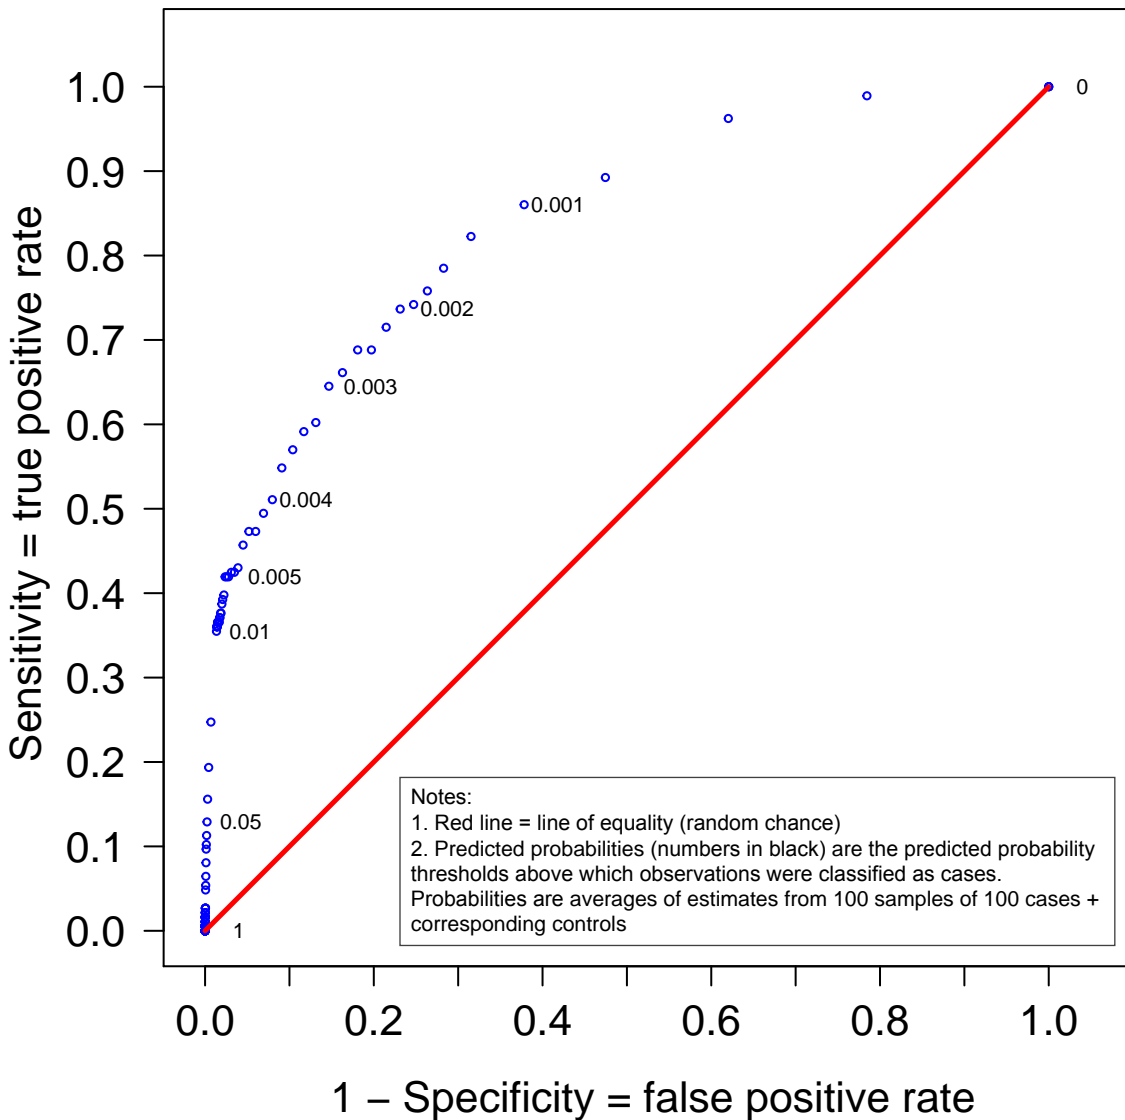

Supplement: ofz483_suppl_supplementary_material.pdf [file ofz483_suppl_supplementary_material.pdf]
